# Supplementary material for: Pollution of the sediments of the coastal zone of the Sambia Peninsula and the Curonian Spit (Southeastern Baltic Sea)
Source: PeerJ. 2018 May 16;6:e4770. doi: 10.7717/peerj.4770 (PMC5960262; doi:10.7717/peerj.4770)
Supplement: Supplemental Information 2 [file peerj-06-4770-s002.xlsx]

## Sheet: Лист1
	1	2	3	4	5	6	7	8	9	10	11	12	13	14	15	16	17	18	19	20	21	22	23	24	25	26	27	28	29	30	31	32	33	34	35	36	37	38	39	40
ANALYST AND DATE:	,	,	,	,	,	,	,	,	,	,	,	,	,	,
SIEVING ERROR:
SAMPLE TYPE:	Unimodal, Moderately Well Sorted	Unimodal, Moderately Sorted	Unimodal, Moderately Well Sorted	Unimodal, Well Sorted	Unimodal, Well Sorted	Unimodal, Well Sorted	Unimodal, Well Sorted	Unimodal, Moderately Well Sorted	Unimodal, Well Sorted	Unimodal, Moderately Well Sorted	Unimodal, Moderately Well Sorted	Unimodal, Moderately Sorted	Trimodal, Very Poorly Sorted	Unimodal, Well Sorted		Unimodal, Very Well Sorted	Bimodal, Poorly Sorted	Unimodal, Very Well Sorted	Unimodal, Poorly Sorted	Bimodal, Moderately Sorted	Bimodal, Moderately Sorted	Unimodal, Moderately Sorted	Unimodal, Moderately Sorted	Unimodal, Moderately Well Sorted	Bimodal, Very Poorly Sorted	Unimodal, Moderately Sorted	Unimodal, Moderately Well Sorted	Unimodal, Moderately Sorted	Unimodal, Poorly Sorted	Unimodal, Moderately Well Sorted	Unimodal, Well Sorted	Unimodal, Poorly Sorted	Bimodal, Very Poorly Sorted	Unimodal, Moderately Well Sorted	Unimodal, Moderately Well Sorted	Unimodal, Well Sorted	Unimodal, Very Well Sorted	Unimodal, Well Sorted	Unimodal, Very Well Sorted	Unimodal, Well Sorted
TEXTURAL GROUP:	Sand	Sand	Sand	Sand	Sand	Sand	Sand	Sand	Sand	Sand	Sand	Sand	Gravelly Sand	Sand			Sandy Gravel		Gravelly Sand	Sand	Sand	Sand	Sand	Sand	Sandy Gravel	Sand	Sand	Sand	Sandy Gravel	Sand	Sand	Gravelly Sand	Gravelly Sand	Sand	Slightly Gravelly Sand	Sand	Sand	Sand	Sand	Sand
SEDIMENT NAME:	Moderately Well Sorted Coarse Sand	Moderately Sorted Very Fine Sand	Moderately Well Sorted Medium Sand	Well Sorted Fine Sand	Well Sorted Very Fine Sand	Well Sorted Very Fine Sand	Well Sorted Very Fine Sand	Moderately Well Sorted Fine Sand	Well Sorted Very Fine Sand	Moderately Well Sorted Medium Sand	Moderately Well Sorted Very Fine Sand	Moderately Sorted Very Fine Sand	Very Fine Gravelly Medium Sand	Well Sorted Very Fine Sand			Sandy Medium Gravel		Medium Gravelly Medium Sand	Moderately Sorted Very Fine Sand	Moderately Sorted Fine Sand	Moderately Sorted Fine Sand	Moderately Sorted Fine Sand	Moderately Well Sorted Very Fine Sand	Sandy Medium Gravel	Moderately Sorted Fine Sand	Moderately Well Sorted Fine Sand	Moderately Sorted Fine Sand	Sandy Coarse Gravel	Moderately Well Sorted Very Fine Sand	Well Sorted Very Fine Sand	Medium Gravelly Very Fine Sand	Medium Gravelly Very Fine Sand	Moderately Well Sorted Very Fine Sand	Slightly Medium Gravelly Very Fine Sand	Well Sorted Fine Sand	Very Well Sorted Fine Sand	Well Sorted Very Fine Sand	Very Well Sorted Very Fine Sand	Well Sorted Very Fine Sand
MEAN	628.965	136.586	354.241	164.766	121.308	131.377	125.734	178.704	134.039	531.06	147.58	161.088	2132.39	97.5483	0	15000	4743.8	15000	1483.55	184.361	193.288	188.378	192.199	154.131	4975.03	227.673	191.874	198.747	86.0138	154.927	119.634	1383.13	4210.95	141.487	608.584	142.575	134.516	140.937	128.533	132.11
SORTING	225.434	109.045	146.361	70.7405	53.7373	50.8254	52.138	121.467	48.5585	234.553	104.064	95.34	3160.77	53.2403	0	0	5286.56	0	3830.99	134.308	132.689	116.508	119.953	92.6908	6938.52	167.522	111.312	137.635	117.087	134.101	48.0077	4137.27	6621.81	157.4	2618.76	61.8032	40.7742	82.758	44.0858	85.3392
SKEWNESS	1.05151	3.20313	1.87379	3.14865	3.61925	4.10582	7.5661	3.6515	2.66465	1.45793	3.4131	2.64971	2.34236	8.12396	#DIV/0!	#DIV/0!	1.09852	#DIV/0!	3.1245	2.10874	2.38472	2.37553	2.40421	3.41864	0.752529	3.11904	2.49648	2.53228	2.89743	3.46956	4.67101	2.98669	1.01481	5.07608	5.30943	7.01382	7.7803	4.81052	7.35755	6.91683
KURTOSIS	6.24115	16.0584	9.85692	20.9534	26.5522	42.3534	101.143	18.565	25.9909	6.9807	19.5836	15.9112	8.80635	99.5627	#DIV/0!	#DIV/0!	2.69292	#DIV/0!	11.0323	9.03132	10.3175	12.8194	12.2007	22.4622	1.56667	14.9597	11.658	10.3115	17.6838	16.1542	39.871	9.92293	2.03143	30.952	29.2129	74.6086	126.135	35.4989	105.684	57.949
MEAN	578.331	111.884	323.505	152.248	112.135	122.976	118.138	155.636	125.214	478.023	125.053	138.831	790.524	89.5541	1	14142.1	2171.55	14142.1	385.945	148.611	160.143	155.297	160.023	134.118	673.363	190.882	167.71	167.761	12.3472	127.277	112.333	176.114	460.837	113.467	139.728	134.048	129.016	126.95	122.551	120.287
SORTING	1.48714	1.75786	1.48127	1.41053	1.42322	1.37755	1.36118	1.5641	1.39988	1.53573	1.68052	1.66987	4.05667	1.43916	1	1	3.59402	1	3.29326	1.84701	1.7748	1.88907	1.82924	1.6294	8.46044	1.68815	1.59829	1.67535	12.5539	1.69886	1.36294	3.92252	8.42402	1.69373	2.5129	1.33142	1.26374	1.48193	1.29416	1.42014
SKEWNESS	-1.35034	0.682713	-0.272835	0.695874	0.400507	0.232689	0.0406714	1.24414	-0.347646	-0.180552	0.574562	0.0582577	0.256623	0.0622635	#DIV/0!	-1.07176	0.00801988	-1.07176	2.04481	0.454567	0.224285	-0.895259	-0.653497	0.133813	0.667238	0.860346	0.532509	0.910909	0.042216	1.41475	0.432516	2.73802	0.938107	1.89236	4.01433	1.20143	0.349695	0.989502	0.406962	1.60094
KURTOSIS	8.39535	5.05119	4.59516	5.53053	6.95031	6.78385	10.6964	6.46784	6.62777	3.54539	4.84238	4.07327	1.98494	11.4813	#DIV/0!	1.09681	1.95799	1.09681	6.66967	2.67439	3.7361	5.23561	5.09396	4.84022	1.57084	4.56927	3.94848	3.91101	1.06682	6.08848	9.02751	9.00877	1.96184	9.66676	20.3726	11.7585	12.3092	7.62647	11.7765	13.495
MEAN	0.790032	3.15993	1.62814	2.71551	3.15669	3.02355	3.08146	2.68375	2.99753	1.06485	2.99939	2.8486	0.33912	3.4811	0	-3.82193	-1.11873	-3.82193	1.37353	2.75039	2.64257	2.6869	2.64365	2.89842	0.570544	2.38924	2.57596	2.57552	1.35685	2.97395	3.15415	2.50542	1.11767	3.13966	2.8393	2.89918	2.95438	2.97767	3.02854	3.05545
SORTING	0.57254	0.813824	0.566838	0.496235	0.509161	0.462103	0.444863	0.645337	0.485301	0.61892	0.748906	0.739732	2.0203	0.525232	0	0	1.8456	0	1.71952	0.885193	0.827658	0.917676	0.871243	0.704344	3.08073	0.75544	0.676532	0.744464	1.41975	0.764566	0.446724	1.97178	3.07451	0.7602	1.32935	0.412971	0.337705	0.56748	0.372021	0.506031
SKEWNESS	1.35034	-0.682713	0.272835	-0.695874	-0.400507	-0.232689	-0.0406714	-1.24414	0.347646	0.180552	-0.574562	-0.0582577	-0.256623	-0.0622635	#DIV/0!	#DIV/0!	-0.00801988	#DIV/0!	-2.04481	-0.454567	-0.224285	0.895259	0.653497	-0.133813	-0.667238	-0.860346	-0.532509	-0.910909	0.194571	-1.41475	-0.432516	-2.73802	-0.938107	-1.89236	-4.01433	-1.20143	-0.349695	-0.989502	-0.406962	-1.60094
KURTOSIS	8.39535	5.05119	4.59516	5.53053	6.95031	6.78385	10.6964	6.46784	6.62777	3.54539	4.84238	4.07327	1.98494	11.4813	#DIV/0!	#DIV/0!	1.95799	#DIV/0!	6.66967	2.67439	3.7361	5.23561	5.09396	4.84022	1.57084	4.56927	3.94848	3.91101	1.21857	6.08848	9.02751	9.00877	1.96184	9.66676	20.3726	11.7585	12.3092	7.62647	11.7765	13.495
MEAN	590.162	109.863	327.595	150.757	111.646	123.395	119.651	151.08	125.576	473.073	124.532	139.244	787.309	89.7204		14142.1	2245.69	14142.1	308.832	142.991	157.255	164.556	164.283	134.352	705.069	185.875	164.013	164.675	687.774	120.794	113.231	123.562	568.759	106.863	120.998	132.76	128.903	124.705	123.632	119.751
SORTING	1.41911	1.63488	1.46017	1.39989	1.39192	1.3577	1.31644	1.48925	1.3772	1.52618	1.62336	1.63005	4.21922	1.3016		1.23659	3.76725	1.23659	2.6318	1.83034	1.75247	1.7452	1.70016	1.57699	7.40837	1.65463	1.58121	1.65389	3.16373	1.5746	1.30942	2.54607	7.52187	1.50291	1.50556	1.28631	1.23748	1.40569	1.25803	1.32259
SKEWNESS	-0.0631148	0.356507	0.0215443	0.183246	0.141505	0.151254	0.0886482	0.236991	0.132336	-0.0566222	0.309341	0.180376	0.186627	-0.00904931		0	0.162752	0	0.449889	0.377334	0.0746053	0.0150436	8.0284e-05	0.171859	0.724376	0.198441	0.149123	0.301681	-0.568566	0.361531	0.0689335	0.549758	0.8654	0.208521	0.334141	0.0970885	0.128812	0.215033	0.155218	0.00779206
KURTOSIS	1.13036	1.55153	1.24031	1.12964	1.44178	1.22457	1.12532	1.31992	1.08774	1.0128	1.14897	0.923719	0.798972	1.04157		0.737705	0.733021	0.737705	2.66452	0.806393	1.04306	1.20892	1.04987	0.954378	0.494142	1.28151	1.07211	1.14036	0.308718	1.73192	1.49249	5.74858	0.472392	2.14586	1.77733	0.970936	0.797665	1.20615	0.938492	1.0592
MEAN	0.760817	3.18622	1.61002	2.7297	3.163	3.01864	3.0631	2.72661	2.99337	1.07987	3.00541	2.84432	0.344998	3.47842		-3.82193	-1.16716	-3.82193	1.6951	2.806	2.66882	2.60335	2.60575	2.89591	0.504164	2.4276	2.60812	2.60231	0.539994	3.04938	3.14266	3.01669	0.81411	3.22617	3.04694	2.91311	2.95565	3.00341	3.01587	3.06189
SORTING	0.504984	0.709181	0.546134	0.485314	0.477077	0.441168	0.396647	0.574584	0.461739	0.609929	0.698983	0.704917	2.07698	0.380284		0.306364	1.91351	0.306364	1.39605	0.87211	0.809388	0.803393	0.765675	0.657169	2.88916	0.726506	0.661025	0.725861	1.66163	0.654986	0.388928	1.34827	2.91109	0.58776	0.590301	0.363235	0.307409	0.491279	0.331167	0.403366
SKEWNESS	0.0631148	-0.356507	-0.0215443	-0.183246	-0.141505	-0.151254	-0.0886482	-0.236991	-0.132336	0.0566222	-0.309341	-0.180376	-0.186627	0.00904931		0	-0.162752	0	-0.449889	-0.377334	-0.0746053	-0.0150436	-8.0284e-05	-0.171859	-0.724376	-0.198441	-0.149123	-0.301681	0.568566	-0.361531	-0.0689335	-0.549758	-0.8654	-0.208521	-0.334141	-0.0970885	-0.128812	-0.215033	-0.155218	-0.00779206
KURTOSIS	1.13036	1.55153	1.24031	1.12964	1.44178	1.22457	1.12532	1.31992	1.08774	1.0128	1.14897	0.923719	0.798972	1.04157		0.737705	0.733021	0.737705	2.66452	0.806393	1.04306	1.20892	1.04987	0.954378	0.494142	1.28151	1.07211	1.14036	0.308718	1.73192	1.49249	5.74858	0.472392	2.14586	1.77733	0.970936	0.797665	1.20615	0.938492	1.0592
MEAN:	Coarse Sand	Very Fine Sand	Medium Sand	Fine Sand	Very Fine Sand	Very Fine Sand	Very Fine Sand	Fine Sand	Fine Sand	Medium Sand	Very Fine Sand	Fine Sand	Coarse Sand	Very Fine Sand		Medium Gravel	Very Fine Gravel	Medium Gravel	Medium Sand	Fine Sand	Fine Sand	Fine Sand	Fine Sand	Fine Sand	Coarse Sand	Fine Sand	Fine Sand	Fine Sand	Coarse Sand	Very Fine Sand	Very Fine Sand	Very Fine Sand	Coarse Sand	Very Fine Sand	Very Fine Sand	Fine Sand	Fine Sand	Very Fine Sand	Very Fine Sand	Very Fine Sand
SORTING:	Moderately Well Sorted	Moderately Sorted	Moderately Well Sorted	Well Sorted	Well Sorted	Well Sorted	Well Sorted	Moderately Well Sorted	Well Sorted	Moderately Well Sorted	Moderately Well Sorted	Moderately Sorted	Very Poorly Sorted	Well Sorted		Very Well Sorted	Poorly Sorted	Very Well Sorted	Poorly Sorted	Moderately Sorted	Moderately Sorted	Moderately Sorted	Moderately Sorted	Moderately Well Sorted	Very Poorly Sorted	Moderately Sorted	Moderately Well Sorted	Moderately Sorted	Poorly Sorted	Moderately Well Sorted	Well Sorted	Poorly Sorted	Very Poorly Sorted	Moderately Well Sorted	Moderately Well Sorted	Well Sorted	Very Well Sorted	Well Sorted	Very Well Sorted	Well Sorted
SKEWNESS:	Symmetrical	Very Coarse Skewed	Symmetrical	Coarse Skewed	Coarse Skewed	Coarse Skewed	Symmetrical	Coarse Skewed	Coarse Skewed	Symmetrical	Very Coarse Skewed	Coarse Skewed	Coarse Skewed	Symmetrical		Symmetrical	Coarse Skewed	Symmetrical	Very Coarse Skewed	Very Coarse Skewed	Symmetrical	Symmetrical	Symmetrical	Coarse Skewed	Very Coarse Skewed	Coarse Skewed	Coarse Skewed	Very Coarse Skewed	Very Fine Skewed	Very Coarse Skewed	Symmetrical	Very Coarse Skewed	Very Coarse Skewed	Coarse Skewed	Very Coarse Skewed	Symmetrical	Coarse Skewed	Coarse Skewed	Coarse Skewed	Symmetrical
KURTOSIS:	Leptokurtic	Very Leptokurtic	Leptokurtic	Leptokurtic	Leptokurtic	Leptokurtic	Leptokurtic	Leptokurtic	Mesokurtic	Mesokurtic	Leptokurtic	Mesokurtic	Platykurtic	Mesokurtic		Platykurtic	Platykurtic	Platykurtic	Very Leptokurtic	Platykurtic	Mesokurtic	Leptokurtic	Mesokurtic	Mesokurtic	Very Platykurtic	Leptokurtic	Mesokurtic	Leptokurtic	Very Platykurtic	Very Leptokurtic	Leptokurtic	Extremely Leptokurtic	Very Platykurtic	Very Leptokurtic	Very Leptokurtic	Mesokurtic	Platykurtic	Leptokurtic	Mesokurtic	Mesokurtic
MODE 1 (mm):	605	95	302.5	152.5	112.5	112.5	112.5	152.5	112.5	605	95	95	302.5	95		15000	855	15000	215	95	152.5	152.5	152.5	95	152.5	152.5	152.5	112.5	152.5	112.5	112.5	112.5	112.5	112.5	112.5	112.5	112.5	112.5	112.5	112.5
MODE 2 (mm):													2400				15000			215	95				15000								15000
MODE 3 (mm):													112.5
MODE 1 (f):	0.747055	3.39793	1.74705	2.73697	3.16096	3.16096	3.16096	2.73697	3.16096	0.747055	3.39793	3.39793	1.74705	3.39793		-3.82193	0.247055	-3.82193	2.23697	3.39793	2.73697	2.73697	2.73697	3.39793	2.73697	2.73697	2.73697	3.16096	2.73697	3.16096	3.16096	3.16096	3.16096	3.16096	3.16096	3.16096	3.16096	3.16096	3.16096	3.16096
MODE 2 (f):													-1.24271				-3.82193			2.23697	3.39793				-3.82193								-3.82193
MODE 3 (f):													3.16096
D10 (mm):	376.834	67.1003	199.392	103.506	73.9344	85.0828	85.1947	100.363	90.008	271.917	71.8572	75.7274	136.04	65.4378		10717.7	446.558	10717.7	156.382	73.4034	78.5764	80.8569	82.6808	75.893	103.193	105.966	97.9031	99.185	111.578	76.0077	77.3429	85.1743	96.2184	69.6458	78.8553	100.435	100.595	85.2898	93.7598	80.2341
D50 (mm):	592.926	101.366	322.283	146.837	109.005	118.69	115.607	146.098	121.323	483.648	113.085	130.427	641.83	91.2375		14142.1	1834.6	14142.1	282.273	121.257	156.383	158.105	163.589	126.938	205.501	179.239	159.481	152.058	999.692	113.056	110.669	116.965	135.022	105.766	114.287	131.52	125.546	118.705	118.945	117.295
D90 (mm):	918.089	261.32	499.463	239.579	172.859	177.473	170.143	257.426	190.992	834.94	257.44	277.291	6129.57	121.377		18660.7	13555.8	18660.7	1673.38	338.488	337.532	325.51	323.014	242.623	16146.6	367.631	317.357	352.649	7.96765e+06	264.772	163.411	306.598	15523.3	188.56	228.952	178.242	172.017	203.974	168.574	169.767
(D90 / D10) (mm):	2.43632	3.89446	2.50493	2.31464	2.33801	2.08589	1.9971	2.56495	2.12194	3.07057	3.58266	3.6617	45.0572	1.85485		1.7411	30.3563	1.7411	10.7006	4.61134	4.2956	4.02576	3.90676	3.19691	156.47	3.46933	3.24154	3.55546	71408.6	3.48349	2.11281	3.59965	161.334	2.70741	2.90345	1.7747	1.71	2.39155	1.79793	2.11589
(D90 - D10) (mm):	541.255	194.219	300.071	136.073	98.9248	92.3903	84.948	157.063	100.984	563.023	185.583	201.564	5993.53	55.9394		7942.93	13109.3	7942.93	1517	265.085	258.956	244.654	240.333	166.73	16043.4	261.665	219.454	253.464	7.96754e+06	188.765	86.0683	221.423	15427.1	118.914	150.097	77.807	71.4224	118.685	74.8142	89.5325
(D75 / D25) (mm):	1.51885	1.5817	1.57556	1.50326	1.39125	1.44933	1.41142	1.55614	1.53042	1.7667	1.78105	2.02479	9.71908	1.42244		1.41421	8.9743	1.41421	2.01339	2.59608	2.11707	1.96893	2.02479	1.90892	84.0047	1.78424	1.82348	1.86823	30.9609	1.55007	1.2999	1.4504	97.6019	1.35748	1.46573	1.43492	1.39906	1.52117	1.38827	1.43567
(D75 - D25) (mm):	248.257	47.2182	151.872	60.0542	36.391	46.372	41.4545	64.9797	54.1327	278.574	72.3458	100.414	2186.45	31.4338		4925.86	6148.92	4925.86	209.784	148.067	118.996	113.037	117.305	88.2163	11573.3	105.929	99.9398	101.323	4327.79	52.7379	28.9475	46.2577	10506.1	32.2002	46.2773	48.2038	43.5999	53.0245	40.6522	44.0449
D10 (f):	0.123294	1.93611	1.00155	2.06143	2.53233	2.49433	2.55518	1.95777	2.38842	0.260255	1.95769	1.85053	-2.61579	3.04243		-4.22193	-3.76084	-4.22193	-0.742764	1.56282	1.5669	1.61922	1.63033	2.04321	-4.01316	1.44367	1.65582	1.5037	-12.9599	1.91718	2.61342	1.70558	-3.95636	2.40691	2.12688	2.48809	2.53938	2.29354	2.56855	2.55838
D50 (f):	0.754076	3.30236	1.6336	2.76771	3.19753	3.07472	3.1127	2.77499	3.04307	1.04797	3.14452	2.93868	0.639738	3.45423		-3.82193	-0.875463	-3.82193	1.82484	3.04386	2.67684	2.66105	2.61186	2.97781	2.28278	2.48004	2.64855	2.7173	0.000444609	3.14489	3.17567	3.09585	2.88873	3.24105	3.12927	2.92664	2.99371	3.07455	3.07164	3.09178
D90 (f):	1.408	3.89754	2.32632	3.27222	3.75761	3.55499	3.55309	3.3167	3.4738	1.87876	3.79872	3.72304	2.8779	3.93373		-3.42193	1.16308	-3.42193	2.67685	3.76801	3.66976	3.62848	3.5963	3.71989	3.27659	3.23832	3.3525	3.33373	3.16387	3.71771	3.69259	3.55344	3.37754	3.84382	3.66465	3.31567	3.31337	3.55148	3.41489	3.63964
(D90 / D10) (f):	11.4198	2.01307	2.32272	1.58735	1.48385	1.42523	1.39054	1.69412	1.45444	7.21892	1.94041	2.01188	-1.1002	1.29296		0.810513	-0.30926	0.810513	-3.60391	2.41103	2.34205	2.24088	2.20587	1.82061	-0.816461	2.24312	2.02467	2.21703	-0.244127	1.93916	1.41293	2.08342	-0.853699	1.59699	1.72301	1.33261	1.3048	1.54847	1.3295	1.42264
(D90 - D10) (f):	1.2847	1.96142	1.32477	1.21079	1.22528	1.06066	0.99791	1.35893	1.08538	1.61851	1.84103	1.87251	5.49369	0.891301		0.8	4.92392	0.8	3.41962	2.20519	2.10286	2.00926	1.96597	1.67668	7.28974	1.79466	1.69668	1.83004	16.1238	1.80053	1.07917	1.84786	7.33391	1.43691	1.53777	0.827576	0.773998	1.25794	0.846341	1.08127
(D75 / D25) (f):	2.30938	1.22337	1.51796	1.23724	1.16148	1.19532	1.17668	1.2594	1.22919	2.28382	1.32032	1.43615	-1.55271	1.1569		0.877208	-0.13438	0.877208	1.79965	1.67011	1.5036	1.46057	1.48253	1.38349	-0.800674	1.4069	1.39831	1.41033	-1.29171	1.22991	1.12636	1.19529	-0.939201	1.14544	1.19846	1.1964	1.17878	1.22482	1.1701	1.18737
(D75 - D25) (f):	0.602981	0.661479	0.655863	0.588095	0.476381	0.535391	0.49715	0.637969	0.613929	0.821057	0.832727	1.01777	3.28082	0.508364		0.5	3.1658	0.5	1.00963	1.37633	1.08207	0.977408	1.01777	0.932758	6.3924	0.835308	0.866695	0.901676	4.95237	0.632336	0.378398	0.536449	6.60884	0.440933	0.551617	0.520966	0.484458	0.605181	0.473288	0.521727
% GRAVEL:	0	0	0	0	0	0	0	0	0	0	0	0	0.291433	0			0.479484		0.0966246	0	0	0	0	0	0.323865	0	0	0	0.499993	0	0	0.0844964	0.27355	0	0.0320277	0	0	0	0	0
% SAND:	0.999259	0.950622	0.999769	0.997781	0.984033	0.988129	0.98574	0.994682	0.983444	0.999678	0.966855	0.975902	0.703838	0.945408			0.519295		0.899816	0.984479	0.980235	0.940662	0.958896	0.977615	0.665248	0.996706	0.994597	0.994211	0.498854	0.975958	0.986464	0.90605	0.720519	0.959332	0.955591	0.997525	0.997351	0.989373	0.995408	0.991192
% MUD:	0.000740926	0.0493783	0.000231427	0.00221867	0.0159667	0.0118713	0.0142603	0.00531754	0.016556	0.000322225	0.0331455	0.0240977	0.00472922	0.0545918			0.00122087		0.00355924	0.0155208	0.0197653	0.0593381	0.0411045	0.0223847	0.0108867	0.00329362	0.00540333	0.00578881	0.00115353	0.0240424	0.0135364	0.00945384	0.0059304	0.040668	0.0123816	0.00247548	0.00264922	0.0106266	0.0045923	0.00880814
% V COARSE GRAVEL:	0	0	0	0	0	0	0	0	0	0	0	0	0	0			0		0	0	0	0	0	0	0	0	0	0	0	0	0	0	0	0	0	0	0	0	0	0
% COARSE GRAVEL:	0	0	0	0	0	0	0	0	0	0	0	0	0.00936955	0			0.0573759		0.0227654	0	0	0	0	0	0.104261	0	0	0	0.499993	0	0	0.0272018	0.0880636	0	0.0103106	0	0	0	0	0
% MEDIUM GRAVEL:	0	0	0	0	0	0	0	0	0	0	0	0	0.052056	0			0.164352		0.051657	0	0	0	0	0	0.219604	0	0	0	0	0	0	0.0572946	0.185487	0	0.0217171	0	0	0	0	0
% FINE GRAVEL:	0	0	0	0	0	0	0	0	0	0	0	0	0.100398	0			0.135129		0.0115139	0	0	0	0	0	0	0	0	0	0	0	0	0	0	0	0	0	0	0	0	0
% V FINE GRAVEL:	0	0	0	0	0	0	0	0	0	0	0	0	0.129609	0			0.122628		0.0106882	0	0	0	0	0	0	0	0	0	0	0	0	0	0	0	0	0	0	0	0	0
% V COARSE SAND:	0.045156	0	0.00558664	0	0	0	0	0	0	0.0322708	0	0	0.128798	0			0.177366		0.0154194	0	0	0	0	0	0	0.00891867	0	0	0	0	0	0	0.0110517	0.0125992	0	0	0	0	0	0
% COARSE SAND:	0.677201	0.0167046	0.0935348	0.0053222	0.00175732	0.00154991	0.00282999	0.0317477	0.000599885	0.438664	0.0146626	0.00830942	0.126935	0.00327545			0.223253		0.0640033	0.0314304	0.0389904	0.0120269	0.0220982	0.0106449	0.00400222	0.0541364	0.0263508	0.0480756	0.0118663	0.0355152	0.00298874	0.0062473	0.00627082	0.0181571	0.00443168	0.00564456	0.00158706	0.010796	0.0020057	0.011815
% MEDIUM SAND:	0.250316	0.0904647	0.718372	0.0729775	0.0231567	0.0204836	0.00593461	0.0724273	0.0165226	0.469944	0.0913831	0.122144	0.203808	0.0102888			0.098647		0.421823	0.199296	0.143857	0.190807	0.173887	0.0726956	0.0589762	0.156016	0.143164	0.137087	0.029678	0.0708934	0.0135275	0.0130919	0.0118376	0.0351184	0.0525276	0.0107671	0.00385027	0.0363962	0.00668566	0.00594568
% FINE SAND:	0.0144009	0.149912	0.156703	0.622757	0.243021	0.385369	0.349163	0.579223	0.439716	0.0558342	0.270387	0.395889	0.163223	0.0542183			0.013574		0.361471	0.24463	0.481333	0.504077	0.499995	0.426964	0.437373	0.599415	0.55922	0.499778	0.297506	0.233827	0.235624	0.268421	0.246036	0.146142	0.247521	0.550499	0.500103	0.369038	0.393983	0.375227
% V FINE SAND:	0.012185	0.69354	0.0255722	0.296725	0.716099	0.580726	0.627812	0.311284	0.526606	0.00296452	0.590422	0.44956	0.0810739	0.877626			0.00645442		0.0370997	0.509123	0.316055	0.233751	0.262915	0.467311	0.164896	0.17822	0.265862	0.309271	0.159804	0.635722	0.734323	0.61829	0.445323	0.747315	0.65111	0.430614	0.49181	0.573143	0.592733	0.598205
% V COARSE SILT:	0.000740926	0.0331251	0.000231427	0.00157434	0.011802	0.0100015	0.0107351	0.00417687	0.0128368	0.000322225	0.0251545	0.0167258	0.00472922	0.0375682			0.00122087		0.00246619	0.0124957	0.0143769	0.0266061	0.0193035	0.0149765	0.00812983	0.00254806	0.00445516	0.00537945	0.000886331	0.0207808	0.0106335	0.00765066	0.00474807	0.0344288	0.0102258	0.00193842	0.00187134	0.00805981	0.00329647	0.00693656
% COARSE SILT:	0	0.00988723	0	0.000391966	0.00253352	0.00113743	0.00214449	0.000693896	0.00226246	0	0.00486112	0.00448449	0	0.0103559			0		0.000664933	0.00184024	0.00327789	0.0199117	0.0132621	0.00450663	0.00167708	0.000453542	0.000576797	0.000249023	0.000162541	0.00198408	0.00176588	0.00109692	0.000719246	0.00379547	0.00131144	0.000326707	0.0004732	0.00156143	0.000788283	0.00113853
% MEDIUM SILT:	0	0.00636595	0	0.00025237	0.00163122	0.000732344	0.00138074	0.000446769	0.0014567	0	0.00312986	0.00288737	0	0.0066677			0		0.000428121	0.00118485	0.00211049	0.0128203	0.00853887	0.00290162	0.0010798	0.000292016	0.000371375	0.000160335	0.000104653	0.00127746	0.00113697	0.00070626	0.000463091	0.00244374	0.000844381	0.000210352	0.000304673	0.00100534	0.000507541	0.000733049
% FINE SILT:	0	0	0	0	0	0	0	0	0	0	0	0	0	0			0		0	0	0	0	0	0	0	0	0	0	0	0	0	0	0	0	0	0	0	0	0	0
% V FINE SILT:	0	0	0	0	0	0	0	0	0	0	0	0	0	0			0		0	0	0	0	0	0	0	0	0	0	0	0	0	0	0	0	0	0	0	0	0	0
% CLAY:	0	0	0	0	0	0	0	0	0	0	0	0	0	0			0		0	0	0	0	0	0	0	0	0	0	0	0	0	0	0	0	0	0	0	0	0	0
