# Supplementary material for: Pollution of the sediments of the coastal zone of the Sambia Peninsula and the Curonian Spit (Southeastern Baltic Sea)
Source: PeerJ. 2018 May 16;6:e4770. doi: 10.7717/peerj.4770 (PMC5960262; doi:10.7717/peerj.4770)
Supplement: Supplemental Information 3 [file peerj-06-4770-s003.xlsx]

## Sheet: Лист1
Point number	Latitude (north)	Longitude (east)	Concentration, mg/kg
			Hg	Cd	Cu	Ni	Pb	Zn	pH	Oil
1	20.0033	54.9547	<0.005	0.14	4.8	0.86	0.54	5	6.69	<40
2	20.0306	54.9472	<0.005	0.54	89	2.4	3.5	17	6.58	<40
3	20.0625	54.9472	<0.005	0.096	0.88	1.5	0.73	56	6.64	<40
4	20.0947	54.9472	<0.005	0.08	1	1.8	0.62	190	6.58	<40
5	20.1258	54.9436	<0.005	0.18	6.1	1.3	0.51	7.2	6.58	<40
6	20.1567	54.9464	<0.005	0.2	16	2.2	0.88	4.8	6.54	<40
7	20.1872	54.9531	<0.005	0.15	6.1	1.5	<0.5	6.6	6.51	<40
8	20.2186	54.955	<0.005	0.3	26	2.1	0.56	6.6	6.46	<40
9	20.25	54.9578	<0.005	0.29	28	1.5	0.86	4.3	6.44	<40
10	20.2817	54.9547	<0.005	0.1	3.9	1	<0.5	6.3	6.45	<40
11	20.3056	54.9428	<0.005	0.48	52	2.1	1.9	8.9	6.29	<40
12	20.3367	54.9394	<0.005	0.14	8.4	2	<0.5	3.7	6.34	<40
13	20.3683	54.9372	<0.005	0.27	9.4	4.2	<0.5	5.8	6.57	<40
14	20.4006	54.9419	<0.005	0.37	38	1.9	1.4	11	6.75	72
15	20.4317	54.9494	<0.005	0.44	59	1.7	1.9	12	6.67	<40
16	20.4597	54.9572	<0.005	0.18	4.3	2	0.98	3.7	6.79	65
17	20.4872	54.9656	<0.005	0.25	25	1.6	1.6	5.1	6.54	<40
18	20.5133	54.9742	<0.005	0.15	3.2	1.3	<0.5	2.1	6.76	<40
19	20.54	54.9842	<0.005	0.12	7.5	1	<0.5	1.4	6.73	<40
20	20.5656	54.995	<0.005	0.12	1.6	1.3	<0.5	2.7	6.48	<40
21	20.5894	55.0064	<0.005	0.39	31	1.7	2.1	8.1	7.08	<40
22	20.6128	55.0183	0.0059	0.082	2.3	<0.5	0.65	2.2	6.7	<40
23	20.6336	55.0306	<0.005	0.26	31	<0.5	2	5.1	6.54	<40
24	20.6558	55.0447	0.008	0.077	5.1	<0.5	<0.5	2.5	6.79	<40
25	20.6789	55.0569	<0.005	0.18	9.7	0.9	1.1	6.9	6.44	<40
26	20.6981	55.0708	<0.005	0.18	16	4.3	0.72	5.3	6.63	<40
27	20.7175	55.0839	<0.005	0.22	8.4	4.8	0.96	6.7	6.49	<40
28	20.7347	55.0983	<0.005	0.31	45	1	1.7	7.6	6.64	<40
29	20.7519	55.1131	0.005	0.16	14	4.4	0.63	4.9	6.52	<40
30	20.7692	55.1283	<0.005	0.061	3.7	<0.5	5.8	4	6.42	<40
31	20.7869	55.1431	<0.005	0.12	3.1	4	<0.5	4.3	6.73	<40
32	20.8056	55.1567	<0.005	0.14	3	4.7	<0.5	3.3	6.54	<40
33	20.8236	55.1706	<0.005	0.12	1.5	1.3	<0.5	3	6.39	<40
34	20.8425	55.1847	<0.005	0.2	5.8	1.1	1.3	4.2	6.39	50
35	20.86	55.1983	<0.005	0.078	2.8	0.63	<0.5	4	6.3	<40
36	20.8772	55.2125	<0.005	0.12	1.6	0.88	<0.5	2	6.3	<40
37	20.8939	55.2272	<0.005	0.14	1.5	1.6	<0.5	3.8	6.67	<40
38	20.9117	55.2411	<0.005	0.12	1.5	1.1	<0.5	2	6.61	<40
39	20.9289	55.2553	<0.005	0.18	1.3	0.56	1.3	7.1	6.37	<40
40	20.9444	55.2703	<0.005	0.12	<0.5	1.1	<0.5	5.3	6.37	<40
Lesnoy	20.6131	55.0158	0.017	0.33	29	2	5	10	6.98	<40
Zelenogradsk	20.4597	54.9567	0.43	0.73	43	6.3	<0.5	7	6.66	310
Zaostrovye	20.2525	54.9561	0.021	0.33	24	<0.5	7.8	13	5.66	100
Pionersky	20.2217	54.9536	0.033	0.67	26	2.5	4.7	19	5.08	140
Svetlogorsk	20.1639	54.9475	0.043	0.35	18	1.5	13	17	5.39	170
Otradnoye	20.1186	54.9436	1.4	0.67	32	1.6	<0.5	46	5.61	59
Primorye	20.0375	54.9442	0.045	0.66	27	4.3	6.5	87	6.63	470
